# Supplementary material for: Epidemiological dynamics of an urban Dengue 4 outbreak in São Paulo, Brazil
Source: PeerJ journal article supplement (doi:10.7717/peerj.1892), 2016-04-05
Supplement: Figure_S1.pdf [file Figure_S1.pdf]

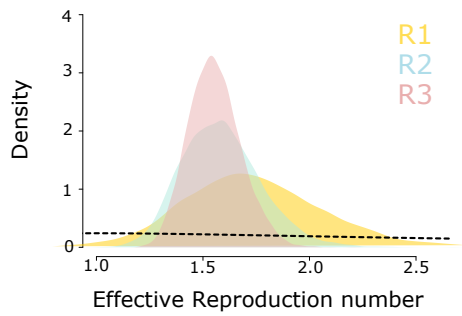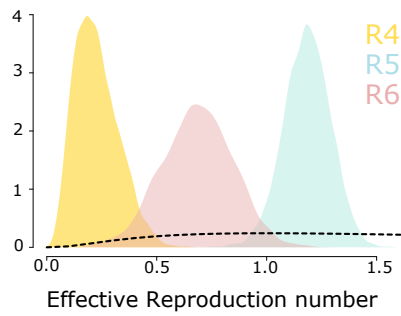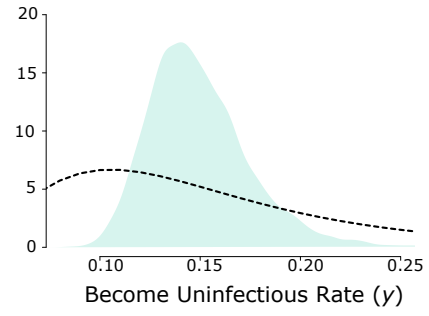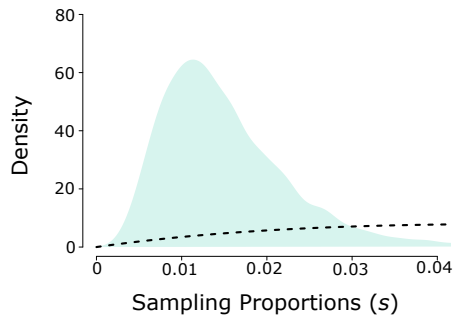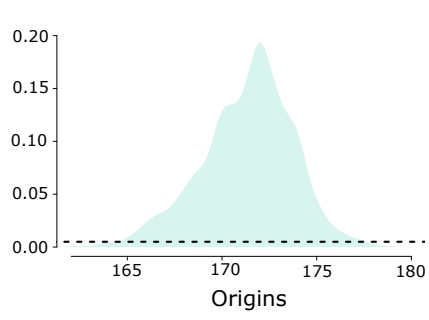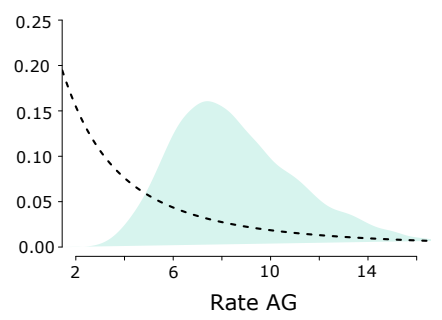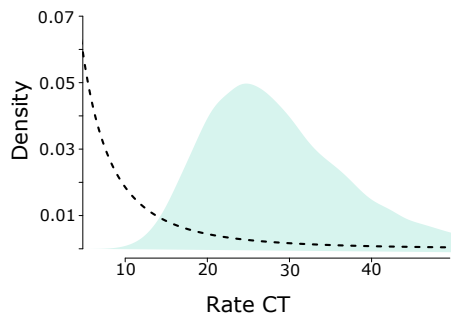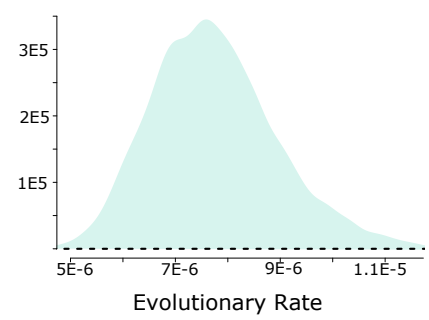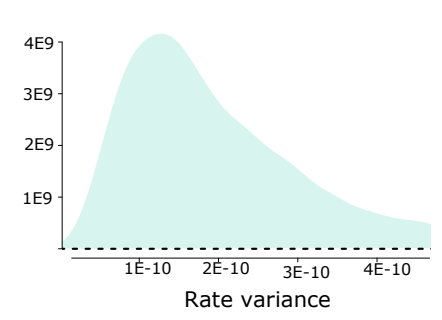

----- Prior Distribution
